## Patterns of testing in the extensive Danish national SARS-CoV-2 test set-up

Mie Agermose Gram (MAG)<sup>1\*</sup>, Nina Steenhard (NS)<sup>2</sup>, Arieh Sierra Cohen (ASC)<sup>2</sup>, Anne-Marie Vangsted (AMV)<sup>2</sup>, Kåre Mølbak (KM)<sup>3,4</sup>, Thøger Gorm Jensen (TGJ)<sup>5</sup>, Christian Holm Hansen (CHH)<sup>1</sup>, Steen Ethelberg (SE)<sup>1,6</sup>

<sup>1</sup> *Department of Infectious Disease Epidemiology and Prevention, Statens Serum Institut, 5 Artillerivej, 2300 Copenhagen S, Denmark*

<sup>2</sup> *TestCentre Denmark, Statens Serum Institut, 5 Artillerivej, 2300 Copenhagen S, Denmark*

<sup>3</sup> *Division of Infectious Disease Preparedness, Statens Serum Institut, 5 Artillerivej, 2300 Copenhagen S, Denmark*

<sup>4</sup> *Department of Veterinary and Animal Sciences, Faculty of Health and Medical Sciences, University of Copenhagen, Grønnegaardsvej 15, 1870 Frederiksberg C, Denmark*

<sup>5</sup> *Department of Clinical Microbiology, Odense University Hospital, J.B. Winsløws Vej 21,2 5000 Odense C, Research Unit of Clinical Microbiology, University of Southern Denmark, Odense, Denmark.*

<sup>6</sup> *Department of Public Health, Global Health Section, University of Copenhagen, Øster Farimagsgade 5, 1014 Copenhagen K, Denmark.*

Contains 3 tables, 2 figures and supplementary material

Word count: Main text: 4290 words; abstract: 250 words.

\*Corresponding author: Mie Agermose Gram, Department of Infectious Disease Epidemiology and Prevention, Statens Serum Institut, 5 Artillerivej, 2300 Copenhagen S, Denmark, T: +45 3268 3458, e-mail: miag@ssi.dk.

1 **Abstract**

2 **Background:** The Danish national SARS-CoV-2 mass test system was among the most ambitious worldwide.  
3 We describe its set-up and analyse differences in patterns of testing per demography and time period in  
4 relation to the three waves of SARS-CoV-2 transmission in Denmark.

5 **Methods:** We included all reported PCR- and rapid antigen-tests performed between 27 February 2020 and  
6 10 March 2022 among all residents aged 2 years or above. Descriptive statistics and Poisson regression  
7 models were used to analyse characteristics of individuals tested for SARS-CoV-2 using a national cohort  
8 study design.

9 **Results:** A total of 63.7 million PCR-tests and 60.0 million antigen-tests were performed in the study period,  
10 testing 91.1% and 79.2% of the Danish population at least once by PCR or antigen, respectively. Female sex,  
11 younger age, Danish heritage and living in the capital area were all factors positively associated with the  
12 frequency of PCR-testing. The association between COVID-19 vaccination and PCR-testing changed from  
13 negative to positive over time.

14 **Conclusion:** We provide details of the widely available, free-of-charge, national SARS-CoV-2 test system,  
15 which served to identify infected individuals, assist isolation of infectious individuals and contact tracing,  
16 and thereby mitigating the spread of SARS-CoV-2 in the Danish population. The test system was utilized by  
17 nearly the entire population at least once, and widely accepted across different demographic groups.  
18 However, demographic differences in the test uptake did exist and should be considered in order not to  
19 cause biases in studies related to SARS-CoV-2, e.g., studies of transmission and vaccine effectiveness.

20

21 **Keywords:** SARS-CoV-2 tests, COVID-19, SARS-CoV-2 RNA, SARS-CoV-2 antigen, RT-PCR, mass-testing

## 22 Background

23 Diagnostic testing to identify individuals infected with the highly transmissible severe acute respiratory  
24 syndrome coronavirus 2 (SARS-CoV-2) is important to reduce the spread of the virus (1, 2). Public health  
25 experts have emphasized mass testing of as many individuals as possible – tracking infected individuals, and  
26 contact tracing – as an effective strategy to reduce the spread of the virus (1). During 2020-2022, Denmark  
27 set up one of the highest PCR mass testing capacities per capita in the world (3). The extensive, openly  
28 available, free-of-charge, national SARS-CoV-2 test system in Denmark, which was initiated at the beginning  
29 of the epidemic (April 2020), was considered by the government to be a prerequisite for an early reopening  
30 after the proactive lockdown of 11 March 2020. The system was continuously expanded throughout the  
31 pandemic (4). Rapid antigen-tests were introduced in April 2021. PCR-tests and rapid antigen-tests were  
32 available to all whether symptomatic or not and without needing a referral. The main goal in Denmark was  
33 to reduce the spread of SARS-CoV-2, protect vulnerable individuals such as nursing home residents and  
34 hospitalized patients, avoid overloading the healthcare system and keep society open to the largest possible  
35 extent. The test strategy was an important tool to identify infected individuals including non-symptomatic  
36 individuals, thereby reducing the spread of SARS-CoV-2 by initiating isolation, and contact tracing.

37 The national SARS-CoV-2 test system also turned out to be a critical source of data for surveillance and  
38 epidemiological analysis of the epidemic, including vaccine effectiveness analyses. For these reasons, and to  
39 inform future decisions on test strategies, it is important to describe the system and understand how test  
40 results reflect the underlying population. In this paper we provide a description of the set-up of the Danish  
41 national SARS-CoV-2 test system and analyse differences in PCR-testing patterns per demographic group and  
42 time period in relation to the three main waves of SARS-CoV-2 transmission which occurred in Denmark.

## 43 **Methods**

### 44 *Description of the development of the Danish national SARS-CoV-2 test system*

45 Denmark, a Scandinavian country of 5.86 million inhabitants, chose a two-pronged approach to testing  
46 for SARS-CoV-2, where testing was organized in two tracks, the so-called 'healthcare' and 'community' tracks  
47 (5). The healthcare track analysed all samples in the first months of the epidemic and then took a clinical  
48 approach with both in- and out-patients tested based on medical referrals, screening before hospitalization,  
49 outpatient visits at hospitals or at general practitioners as well as regular screening of healthcare staff. The  
50 samples from the healthcare track were analysed by the 10 clinical microbiology laboratories that exist in  
51 Denmark, within the regional hospitals, usually around the clock for hospital patients. During 2020, capacity  
52 was greatly increased by new instruments and expansion of the staff, the laboratories were mandated to be  
53 able to analyse up to 30,000 samples a day.

54 The second track, the community track, was established in addition to the healthcare track to provide  
55 readily available, free-of-charge testing in the local community, on-demand and without referrals. The  
56 community track, became responsible for more than 80% of the tests and its set-up is briefly summarised  
57 below. More information, including description of the laboratory procedures and detection of viral variants  
58 is found in the Supplementary Material.

59 Laboratory activities in the community track were centralized and conducted at Statens Serum Institut  
60 (SSI), the Danish national institute for infectious disease control which operates under the authority of the  
61 Ministry of Health. In April 2020, a high capacity, highly automated laboratory (TestCenter Denmark) was  
62 established at SSI in order to handle the large influx of samples. During the pandemic, the laboratory capacity  
63 reached 200.000 daily PCR-tests; the mandated performance requirement was that test results for 80% were  
64 reported within 24 hours. Oropharyngeal swabs for PCR-testing were taken by trained professionals in a  
65 network of testing stations that were established during the pandemic. When operating at full capacity,

66 people had a maximum of 20 km distance from their home to the nearest testing station as per government  
67 requirements.

68

#### 69 *Data logistics*

70 The testing stations of the community track used a centralized on-line booking system allowing users to  
71 book an appointment at any testing station via a single webpage. When booking on-line, users were identified  
72 via the existing “NemID” system, which is an app-based all-purpose, compulsory, national electronic  
73 identification system consisting of a user ID, a password and a (electronic) code card. Drop-in testing was  
74 sometimes available, subject to the demand for testing. All samples were registered electronically using bar  
75 code scanning in conjunction with sampling and without paper forms. All samples were registered via  
76 WebReq, which is a national online system for medical sample registration (5). Users were identified by  
77 scanning their healthcare ID card. Samples were registered by scanning the 2D barcode on the bottom of the  
78 matrix tube (a tube originally used for biobanking and not routine microbiology testing; in the healthcare  
79 track tubes were labelled with a unique national sample number). Thus, all sample registration was  
80 performed electronically with no manual data entry. All order data was transferred to a database at either  
81 SSI for the community track or the hospital laboratory for the healthcare track and was used to match  
82 laboratory results with patient data.

83 All test results were registered on the individual, using the Danish unique personal identification  
84 number, which is used in all national registries, enabling individual-level linkages between registries (6).  
85 Results were, depending on the requestor, reported electronically to either the patient’s GP or the hospitals  
86 electronic patient record and at the same time sent to and registered in the Danish Microbiology Database  
87 (MiBa) enabling real-time epidemiological surveillance throughout the epidemic (5). The SARS-CoV-2 results  
88 in MiBa were captured by an online service that allowed individuals to see their own test results via various  
89 existing public web-based health interfaces (e.g. [www.sundhed.dk](http://www.sundhed.dk)) and mobile apps. Upon completed test,

90 the user would receive an SMS or push-up notice, advising the user to log in and see the result. Users that  
91 tested positive for variants of concern could then be contacted directly via telephone by the contact tracing  
92 group of the Danish Patient Safety Authority.

93

#### 94 *Rapid antigen-testing*

95 From February 2021 rapid antigen-test also became part of the Danish community test system. It was  
96 funded by the Government, relied on test stations, and the public national data infrastructure. Thus, for  
97 public rapid antigen-testing, all test data and results were electronically traceable and thus available to the  
98 users, the medical system and for surveillance. A variety of assays were used for rapid antigen-testing, which  
99 was performed by several private companies on government contracts offering their services at testing  
100 stations throughout the country. Individuals who received a positive antigen-test result were advised to have  
101 it confirmed with a PCR-test in the community track, which also allowed positive samples to undergo WGS.

102

#### 103 *Data for the analyses of this paper*

104 The data analysis study presented in this paper was designed as a nationwide register-based cohort  
105 study, i.e., with the entire Danish population as cohort members. PCR-tests from both the community track  
106 and the healthcare track were included. The proportion of total PCR-test performed was 83.4% and 16.6% in  
107 the community and healthcare track, respectively.

108 Information on date of birth, sex, heritage, vital status, emigration and current residence municipality  
109 were obtained from the Danish Civil Registration System (CRS) (6). Information on vital status and emigration  
110 status were used for censoring in the Poisson regression models. Information on all positive, negative and  
111 inconclusive PCR-tests and rapid antigen-tests performed by the healthcare track and the society track were

112 obtained from MiBa (5). Information on administrated COVID-19 vaccines was obtained from the Danish  
113 Vaccination Registry (7).

114 The study population included all residents in Denmark aged 2 years or above (all residents eligible for  
115 SARS-CoV-2 tests). The study period was February 27, 2020 to March 10, 2022, i.e. from the first diagnosed  
116 case in Denmark until the official end of the period during which testing without medical indication was  
117 broadly available. The study consists of two descriptive analyses. The first descriptive analysis provides  
118 characteristics of individuals tested ‘never’, ‘rarely’, ‘commonly’ and ‘often’, stratified by PCR and rapid  
119 antigen-tests. The second descriptive analysis provides characteristics of PCR-tested individuals in three sub-  
120 periods to account for variation in test capacity and the emergence of new SARS-CoV-2 variants in each  
121 period: The periods were defined according to implementation and lifting of restrictions. Period I was from  
122 the first positive PCR-test in Denmark until the start of the second lockdown (February 27, 2020 to December  
123 16, 2020). Period II was from the start of the second lockdown until all restrictions were lifted (December 17,  
124 2020 to September 30, 2021); this period corresponds also broadly speaking to the time when vaccines were  
125 rolled out. Period III spanned from the reintroduction of restrictions until the implementation of guidelines  
126 (8) advising that PCR-testing be done only if symptomatic or at increased risk of a serious course of COVID-  
127 19 (November 11, 2021 to March 10, 2022), effectively ending the mass-testing period. We used Poisson  
128 regression to provide an incidence rate ratio (IRR) including a 95% confidence interval (CI), for being PCR-  
129 tested by sex, age groups, vaccination status, infection status, heritage and type of area. For this analysis,  
130 antigen-tests were excluded since during the epidemic, the PCR-test results were the primary basis for  
131 surveillance and since PCR-tests have been primarily utilized in epidemiological studies.

132

### 133 *Statistical analysis*

134 Characteristics of individuals that were tested ‘never’, ‘rarely’, ‘commonly’ or ‘often’ were described  
135 using proportions. For both PCR-tests and rapid antigen-tests, individuals were categorized as ‘never

136 tested' if they had 0 tests, 'rarely' if they had 1-3 tests, 'commonly' if they had 4-15 tests and 'often' if they  
137 had more than 15 tests performed during the entire study period. Rarely, commonly and often were  
138 defined by quartiles of number of PCR-test by individuals with one or more PCR-tests. Characteristics of  
139 individuals PCR-tested in Period I, II and III were described using number of tested individuals and  
140 proportion tested individuals. The included characteristics were sex (female/male), age group at start of  
141 study period (10 levels: 2-9 years, 10-19 years, 20-29 years, 30-39 years, 40-49 years, 50-59 years, 60-69  
142 years, 70-79 years, 80-89 years and 90+ years), heritage (four levels: Danish, non-western, western and  
143 unknown) and type of area (six levels: capital municipalities, commuter municipalities, metropolitan  
144 municipalities, provincial municipalities, rural municipalities and unknown). The definitions of Heritage and  
145 type of area were according to Statistics Denmark (9). The Heritage definition is presented in  
146 Supplementary (S1 Table).

147 Crude and adjusted IRR were calculated using Poisson regression models for each of the three periods.  
148 The adjusted Poisson regression models were adjusted for the variables above defined, i.e.: age group, sex,  
149 vaccination status, SARS-CoV-2 infection status (no infection/previous infected), heritage, and type of area.  
150 Individuals were defined as previous infected if they were registered with a positive PCR-test in MiBa  
151 otherwise they were defined as not infected. Vaccination status and infection status were included as time-  
152 varying covariates in the regression model by splitting time using Lexis expansion. However, for Period I,  
153 vaccination status was not analysed as the vaccination program had not yet been initiated. Only the  
154 covariate heritage had missing values. The missing values were categorized as unknown and included in  
155 analyses.



## 156 Results

157 Between February 27, 2020 and March 10, 2022, there were in total 6,089,618 million residents in the  
 158 Danish population of which 5,831,730 were 2 years or above at the start of this period. During this period, a  
 159 total of 63.7 million PCR-tests and 60.0 million rapid antigen-tests were registered. The median number of  
 160 PCR-tests and rapid antigen-tests done per individual was 7. Of the 5,831,730 individuals, 8.9% were never  
 161 PCR-tested while 20.8% were never rapid antigen-tested. Among those often PCR-tested, the proportion of  
 162 males was lower compared to females. The proportion of often PCR-tested was 29.9% and 19.0% among  
 163 females and men, respectively. The proportion of never PCR-tested was 7.2% and 17.0% among individuals  
 164 vaccinated and not vaccinated during the study period, respectively (Table 1). Furthermore, the proportion  
 165 of never PCR or antigen-tested were higher among the oldest age groups compared to the youngest age  
 166 groups (Table 1).

167 **Table 1. Characteristics of 5,831,730 individuals tested by PCR test or rapid antigen test, by group of test**  
 168 **frequency, categorised as: never, rarely, commonly and often, Denmark, 2020-2022.**

|                                                      | PCR tested          |                        |                           |                       | Rapid antigen tested |                        |                           |                       |
|------------------------------------------------------|---------------------|------------------------|---------------------------|-----------------------|----------------------|------------------------|---------------------------|-----------------------|
|                                                      | Never (%)<br>0 test | Rarely (%)<br>1-3 test | Commonly (%)<br>4-15 test | Often (%)<br>>15 test | Never (%)<br>0 test  | Rarely (%)<br>1-3 test | Commonly (%)<br>4-15 test | Often (%)<br>>15 test |
| <b>Total</b>                                         | 8.9                 | 20.2                   | 47.4                      | 23.5                  | 20.8                 | 18.7                   | 34.4                      | 26.0                  |
| <b>Sex</b>                                           |                     |                        |                           |                       |                      |                        |                           |                       |
| Female                                               | 8.1                 | 18.1                   | 45.9                      | 27.9                  | 20.9                 | 18.3                   | 33.6                      | 27.2                  |
| Male                                                 | 9.7                 | 22.3                   | 48.9                      | 19.0                  | 20.8                 | 50.8                   | 35.3                      | 47.5                  |
| <b>Age groups (years)</b>                            |                     |                        |                           |                       |                      |                        |                           |                       |
| 2-9                                                  | 4.1                 | 17.7                   | 62.3                      | 15.8                  | 34.4                 | 10.8                   | 34.4                      | 2.5                   |
| 10-19                                                | 2.5                 | 12.1                   | 59.8                      | 25.5                  | 3.6                  | 5.6                    | 25.4                      | 65.4                  |
| 20-29                                                | 7.7                 | 16.5                   | 50.5                      | 25.3                  | 9.4                  | 8.1                    | 37.4                      | 23.6                  |
| 30-39                                                | 6.0                 | 14.7                   | 47.7                      | 31.5                  | 10.7                 | 14.5                   | 42.4                      | 32.3                  |
| 40-49                                                | 5.6                 | 14.8                   | 44.6                      | 35.0                  | 11.9                 | 12.1                   | 42.4                      | 14.5                  |
| 50-59                                                | 7.7                 | 18.9                   | 42.7                      | 30.7                  | 18.3                 | 22.4                   | 40.8                      | 18.5                  |
| 60-69                                                | 13.0                | 27.1                   | 43.1                      | 16.8                  | 28.6                 | 17.3                   | 34.9                      | 3.5                   |
| 70-79                                                | 19.6                | 36.7                   | 38.3                      | 5.4                   | 40.7                 | 33.0                   | 24.2                      | 2.2                   |
| 80-89                                                | 25.8                | 39.6                   | 29.9                      | 4.7                   | 70.4                 | 4.7                    | 6.6                       | 0.0                   |
| ≥90                                                  | 28.1                | 34.2                   | 29.6                      | 8.1                   | 93.0                 | 6.3                    | 0.7                       | 0.0                   |
| <b>Vaccinated with ≥2 doses before March 10 2022</b> |                     |                        |                           |                       |                      |                        |                           |                       |
| Yes                                                  | 7.2                 | 19.3                   | 47.5                      | 26.0                  | 17.5                 | 19.0                   | 35.9                      | 27.6                  |
| No                                                   | 17.0                | 24.7                   | 47.2                      | 11.0                  | 37.0                 | 15.8                   | 27.1                      | 12.2                  |

| Heritage                    |      |      |      |      |      |      |      |      |
|-----------------------------|------|------|------|------|------|------|------|------|
| Danish                      | 7.6  | 19.3 | 47.7 | 25.4 | 19.8 | 81.5 | 34.6 | 85.0 |
| Non-west                    | 8.9  | 23.5 | 52.7 | 14.9 | 17.6 | 21.1 | 37.4 | 23.9 |
| West                        | 16.1 | 23.0 | 43.5 | 17.4 | 22.6 | 7.5  | 34.4 | 6.4  |
| Unknown                     | 48.3 | 36.2 | 15.0 | 0.5  | 92.1 | 4.8  | 2.6  | 0.4  |
| Type of area (municipality) |      |      |      |      |      |      |      |      |
| Capital Municipalities      | 8.0  | 16.8 | 49.3 | 25.9 | 19.3 | 16.5 | 34.7 | 29.5 |
| Commuter Municipalities     | 9.7  | 22.7 | 46.8 | 20.8 | 21.3 | 17.3 | 35.3 | 14.4 |
| Metropolitan Municipalities | 8.4  | 19.0 | 47.9 | 24.7 | 18.8 | 17.4 | 33.9 | 30.0 |
| Provincial Municipalities   | 8.9  | 20.9 | 47.0 | 23.3 | 21.7 | 24.1 | 34.4 | 21.1 |
| Rural Municipalities        | 9.9  | 23.0 | 45.5 | 21.6 | 23.0 | 20.3 | 33.6 | 23.1 |

169

170 The number of daily samples increased throughout the pandemic from a few thousand to a maximum  
171 of over 200,000 in the community track and 30,000 in the healthcare track. The number of PCR-tests peaked  
172 in December 2021 and January 2022, while the number of rapid antigen-tests peaked in May and June 2021;  
173 the highest number of daily PCR and rapid antigen-tests were 270,248 and 544,361, respectively (Figure 1).  
174 The number of PCR-test stations in use also varied over the study period, with a median of 268 available PCR-  
175 test stations. During 2020, the number of test stations increased from 18 to 250. The highest number were  
176 available between March and June 2021, and between December 2021 and February 2022 (Figure 2).

177 Figure 1. Number of performed PCR tests (dark blue) and rapid antigen tests (blue) by sample date, February  
178 27, 2020 to March 10, 2022

179 Figure 2. Active PCR test stations in Denmark by year and ISO week. A test station was included as active if  
180  $\geq 1$  test performed was registered.

181

182 The proportion of individuals PCR-tested at least once was 63.1% in Period I, but higher in Period II  
183 (76.6%) and III (78.0%) although the opportunity to be rapid antigen-tested also existed in these periods. In  
184 all three periods, females, younger age groups and individuals from municipalities in the capital area were  
185 more likely to get PCR-tested (Table 2). Especially the older age groups were less likely to get PCR-tested in

186 Period II and III compared to Period I. Among individuals aged 70-79, 47.9% were PCR-tested in Period I  
 187 compared to 57.8% and 55.1% which were PCR-tested in Period II and III, respectively (Table 2).

188 **Table 2. Characteristics of all individuals tested by RT-PCR in Denmark in the three waves**

|                                                      | February 27, 2020 to December 16, 2020<br>(N-tests 9,006,261) |                   | December 17, 2020 to September 30, 2021<br>(N-tests 32,484,654) |                   | November 11, 2021 to March 10, 2022<br>(N-tests 19,421,685) |                   |
|------------------------------------------------------|---------------------------------------------------------------|-------------------|-----------------------------------------------------------------|-------------------|-------------------------------------------------------------|-------------------|
|                                                      | Number of tested individuals                                  | Percentage tested | Number of tested individuals                                    | Percentage tested | Number of tested individuals                                | Percentage tested |
| <b>Sex</b>                                           |                                                               |                   |                                                                 |                   |                                                             |                   |
| Female                                               | 1,928,783                                                     | 66.9              | 2,274,409                                                       | 78.7              | 2,310,337                                                   | 79.9              |
| Male                                                 | 1,730,457                                                     | 60.7              | 2,130,411                                                       | 74.5              | 2,171,062                                                   | 76.0              |
| <b>Age groups (years)</b>                            |                                                               |                   |                                                                 |                   |                                                             |                   |
| 2-9                                                  | 278,057                                                       | 56.5              | 353,434                                                         | 72.2              | 422,838                                                     | 86.7              |
| 10-19                                                | 525,977                                                       | 76.5              | 591,592                                                         | 86.2              | 617,121                                                     | 91.0              |
| 20-29                                                | 572,440                                                       | 71.7              | 669,383                                                         | 83.9              | 646,556                                                     | 81.9              |
| 30-39                                                | 487,740                                                       | 70.4              | 591,400                                                         | 84.4              | 603,532                                                     | 85.0              |
| 40-49                                                | 522,698                                                       | 68.9              | 629,392                                                         | 83.6              | 632,747                                                     | 85.7              |
| 50-59                                                | 511,565                                                       | 63.7              | 638,289                                                         | 79.5              | 639,698                                                     | 79.4              |
| 60-69                                                | 369,607                                                       | 55.6              | 470,170                                                         | 70.4              | 465,568                                                     | 69.2              |
| 70-79                                                | 270,815                                                       | 47.9              | 331,392                                                         | 57.8              | 319,095                                                     | 55.1              |
| 80-89                                                | 100,609                                                       | 44.3              | 108,995                                                         | 46.4              | 112,025                                                     | 46.1              |
| ≥90                                                  | 19,732                                                        | 45.0              | 20,773                                                          | 46.7              | 22,219                                                      | 49.8              |
| <b>Vaccinated with ≥2 doses before March 10 2022</b> |                                                               |                   |                                                                 |                   |                                                             |                   |
| Yes                                                  | 3,158,071                                                     | 65.9              | 3,774,898                                                       | 78.4              | 3,754,205                                                   | 78.5              |
| No                                                   | 501,169                                                       | 53.2              | 629,922                                                         | 67.2              | 727,194                                                     | 75.3              |
| <b>Heritage</b>                                      |                                                               |                   |                                                                 |                   |                                                             |                   |
| Danish                                               | 3,085,149                                                     | 64.5              | 3,707,642                                                       | 77.0              | 3,801,913                                                   | 79.0              |
| Non-west                                             | 329,324                                                       | 63.3              | 410,981                                                         | 77.5              | 400,936                                                     | 74.7              |
| West                                                 | 221,954                                                       | 59.4              | 278,242                                                         | 71.3              | 277,353                                                     | 70.2              |
| Unknown                                              | 22,813                                                        | 40.2              | 7,955                                                           | 52.6              | 1,197                                                       | 51.5              |
| <b>Type of area (municipality)</b>                   |                                                               |                   |                                                                 |                   |                                                             |                   |

|                             |           |      |           |      |           |      |
|-----------------------------|-----------|------|-----------|------|-----------|------|
| Capital Municipalities      | 1,122,019 | 69.5 | 1,306,016 | 80.4 | 1,293,771 | 79.5 |
| Commuter Municipalities     | 511,395   | 57.5 | 656,050   | 73.7 | 676,580   | 76.2 |
| Metropolitan Municipalities | 514,451   | 65.8 | 620,260   | 79.0 | 619,941   | 78.8 |
| Provincial Municipalities   | 785,723   | 60.7 | 984,584   | 75.9 | 1,013,578 | 78.2 |
| Rural Municipalities        | 725,652   | 62.9 | 837,910   | 72.6 | 877,529   | 76.3 |
| Unknown                     | 1,928,783 | 66.9 | 2,274,409 | 78.7 | 2,310,337 | 79.9 |

189

190 The estimates from the adjusted Poisson regression models showed that throughout the study period,  
191 males were less likely to be PCR-tested, (IRR: 0.77) compared to females (Table 3). Also, over both Periods I,  
192 II and III, individuals with non-Danish heritage had relatively lower test rates. In period I (i.e., most of 2020),  
193 individuals aged 2-9 years and the oldest age groups were least likely to be PCR-tested compared to  
194 individuals aged 10-49 years. After SARS-CoV-2 infection, individuals had almost three times the test rate  
195 compared to those without a previous SARS-CoV-2 infection, different from in Periods II and III. Residents of  
196 commuter municipalities had the lowest IRR of being PCR-tested (IRR: 0.68) compared to capital  
197 municipalities (Table 3).

198

199 **Table 3. Unadjusted and adjusted IRR for PCR testing by sex, age, vaccination status, infection status, heritage and type of area in two study periods**

|                                    | February 27, 2020 to December 16, 2020 (Period I) |           |                         |                        | December 17, 2020 to September 30, 2021 (Period II) |           |                         |                        | November 11, 2021 to March 10, 2022 (Period III) |           |                         |                        |
|------------------------------------|---------------------------------------------------|-----------|-------------------------|------------------------|-----------------------------------------------------|-----------|-------------------------|------------------------|--------------------------------------------------|-----------|-------------------------|------------------------|
| Sex                                | Number of tests                                   | PYRS      | Unadjusted IRR (95% CI) | Adjusted* IRR (95% CI) | Number of tests                                     | PYRS      | Unadjusted IRR (95% CI) | Adjusted* IRR (95% CI) | Number of tests                                  | PYRS      | Unadjusted IRR (95% CI) | Adjusted* IRR (95% CI) |
| Female                             | 4,920,688                                         | 2,286,433 | Reference               | Reference              | 13,530,088                                          | 2,207,135 | Reference               | Reference              | 10,637,259                                       | 929,959   | Reference               | Reference              |
| Male                               | 3,846,754                                         | 2,260,054 | 0.79 (0.79-0.79)        | 0.78 (0.78-0.78)       | 17,779,026                                          | 2,177,791 | 0.77 (0.77-0.77)        | 0.74 (0.74-0.74)       | 8,050,190                                        | 919,373   | 0.77 (0.76-0.77)        | 0.75 (0.75-0.75)       |
| <b>Age groups (years)</b>          |                                                   |           |                         |                        |                                                     |           |                         |                        |                                                  |           |                         |                        |
| 2-9                                | 542,436                                           | 392,514   | 0.58 (0.58-0.58)        | 0.57 (0.57-0.57)       | 1,514,471                                           | 381,013   | 0.55 (0.55-0.55)        | 0.51 (0.51-0.51)       | 1,784,059                                        | 158,609   | 1.01 (1.01-1.01)        | 1.11 (1.11-1.11)       |
| 10-19                              | 1,306,173                                         | 547,509   | Reference               | Reference              | 3,863,057                                           | 532,821   | Reference               | Reference              | 2,457,315                                        | 220,289   | Reference               | Reference              |
| 20-29                              | 1,460,429                                         | 624,130   | 0.98 (0.98-0.98)        | 0.95 (0.95-0.95)       | 4,902,429                                           | 599,673   | 2.06 (2.05-2.06)        | 1.16 (1.16-1.16)       | 2,440,136                                        | 252,030   | 0.87 (0.86-0.87)        | 0.86 (0.85-0.86)       |
| 30-39                              | 1,228,660                                         | 548,602   | 0.94 (0.94-0.94)        | 0.92 (0.92-0.92)       | 4,889,405                                           | 540,595   | 2.28 (2.27-2.28)        | 1.31 (1.31-1.32)       | 2,738,872                                        | 230,466   | 1.07 (1.07-1.07)        | 1.06 (1.06-1.06)       |
| 40-49                              | 1,330,749                                         | 605,485   | 0.92 (0.92-0.92)        | 0.91 (0.91-0.91)       | 5,848,433                                           | 586,366   | 2.51 (2.50-2.51)        | 1.50 (1.50-1.50)       | 3,192,933                                        | 240,321   | 1.19 (1.19-1.19)        | 1.12 (1.11-1.12)       |
| 50-59                              | 1,266,402                                         | 641,082   | 0.83 (0.83-0.83)        | 0.83 (0.82-0.83)       | 5,781,817                                           | 624,257   | 2.33 (2.33-2.33)        | 1.43 (1.43-1.44)       | 3,031,860                                        | 261,455   | 1.04 (1.04-1.04)        | 0.94 (0.94-0.94)       |
| 60-69                              | 816,853                                           | 530,159   | 0.65 (0.64-0.65)        | 0.64 (0.64-0.65)       | 3,121,319                                           | 513,261   | 1.53 (1.53-1.53)        | 0.98 (0.98-0.98)       | 1,826,798                                        | 216,976   | 0.76 (0.75-0.76)        | 0.66 (0.66-0.67)       |
| 70-79                              | 542,323                                           | 448,602   | 0.51 (0.51-0.51)        | 0.50 (0.50-0.50)       | 1,117,676                                           | 427,399   | 0.66 (0.66-0.66)        | 0.46 (0.46-0.46)       | 840,287                                          | 184,129   | 0.42 (0.42-0.42)        | 0.36 (0.36-0.36)       |
| 80-89                              | 222,524                                           | 176,300   | 0.53 (0.53-0.53)        | 0.51 (0.51-0.51)       | 236,573                                             | 157,577   | 0.38 (0.38-0.38)        | 0.32 (0.32-0.33)       | 294,989                                          | 73,442    | 0.40 (0.40-0.40)        | 0.33 (0.33-0.33)       |
| ≥90                                | 50,893                                            | 32,105    | 0.66 (0.66-0.67)        | 0.61 (0.60-0.61)       | 33,934                                              | 21,964    | 0.39 (0.38-0.39)        | 0.40 (0.40-0.41)       | 80,200                                           | 11,616    | 0.72 (0.73-0.73)        | 0.58 (0.58-0.58)       |
| <b>Vaccination status</b>          |                                                   |           |                         |                        |                                                     |           |                         |                        |                                                  |           |                         |                        |
| Unvaccinated or first vaccine dose | -                                                 | -         | -                       | -                      | 27,261,375                                          | 3,252,360 | Reference               | Reference              | 3,488,136                                        | 362,528   | Reference               | Reference              |
| Second vaccine dose                | -                                                 | -         | -                       | -                      | 4,042,478                                           | 1,130,643 | 0.43 (0.43-0.43)        | 0.44 (0.44-0.44)       | 7,181,130                                        | 677,356   | 1.10 (1.10-1.10)        | 1.16 (1.16-1.16)       |
| Third vaccine dose                 | -                                                 | -         | -                       | -                      | -                                                   | -         | -                       | -                      | 8,018,183                                        | 809,448   | 1.03 (1.03-1.03)        | 1.28 (1.28-1.28)       |
| <b>SARS-CoV-2 infection status</b> |                                                   |           |                         |                        |                                                     |           |                         |                        |                                                  |           |                         |                        |
| No infection                       | 8,725,239                                         | 4,539,788 | Reference               | Reference              | 30,737,893                                          | 4,317,792 | Reference               | Reference              | 17,339,226                                       | 1,696,155 | Reference               | Reference              |

|                                    |           |           |                  |                  |            |           |                  |                  |            |           |                  |                  |
|------------------------------------|-----------|-----------|------------------|------------------|------------|-----------|------------------|------------------|------------|-----------|------------------|------------------|
| Previous infected                  | 42,203    | 6,699     | 3.28 (3.25-3.31) | 2.97 (2.94-3.00) | 977,293    | 147,645   | 0.93 (0.93-0.93) | 0.92 (0.92-0.92) | 1,507,326  | 166,786   | 0.88 (0.88-0.89) | 0.85 (0.85-0.85) |
| <b>Heritage</b>                    |           |           |                  |                  |            |           |                  |                  |            |           |                  |                  |
| Danish                             | 7,376,879 | 3,831,332 | Reference        | Reference        | 27,354,547 | 3,699,544 | Reference        | Reference        | 16,309,738 | 1,550,717 | Reference        | Reference        |
| Non-western                        | 807,877   | 410,424   | 1.02 (1.02-1.02) | 0.87 (0.87-0.88) | 2,220,577  | 405,543   | 0.74 (0.74-0.74) | 0.61 (0.61-0.61) | 1,361,216  | 174,354   | 0.74 (0.74-0.74) | 0.70 (0.70-0.70) |
| Western                            | 535,505   | 287,165   | 0.97 (0.97-0.97) | 0.85 (0.85-0.86) | 1,731,056  | 279,085   | 0.84 (0.84-0.84) | 0.71 (0.71-0.71) | 1,014,460  | 123,948   | 0.78 (0.78-0.78) | 0.74 (0.74-0.74) |
| Unknown                            | 47,181    | 17,566    | 1.39 (1.38-1.41) | 1.47 (1.45-1.48) | 2,934      | 755       | 0.53 (0.51-0.55) | 0.55 (0.54-0.58) | 2,035      | 314       | 0.61 (0.58-0.63) | 0.72 (0.69-0.75) |
| <b>Type of area (municipality)</b> |           |           |                  |                  |            |           |                  |                  |            |           |                  |                  |
| Capital Municipalities             | 3,038,856 | 1,274,925 | Reference        | Reference        | 9,034,268  | 1,199,828 | Reference        | Reference        | 5,231,891  | 508,849   | Reference        | Reference        |
| Commuter Municipalities            | 1,116,671 | 706,702   | 0.66 (0.66-0.66) | 0.68 (0.68-0.68) | 4,685,760  | 713,111   | 0.87 (0.87-0.87) | 0.87 (0.86-0.87) | 2,902,934  | 299,810   | 0.94 (0.94-0.94) | 0.92 (0.92-0.92) |
| Metropolitan Municipalities        | 1,234,705 | 619,498   | 0.84 (0.83-0.84) | 0.83 (0.83-0.83) | 4,572,545  | 584,038   | 1.04 (1.04-1.04) | 1.02 (1.02-1.02) | 2,405,581  | 246,445   | 0.95 (0.95-0.95) | 0.93 (0.93-0.93) |
| Provincial Municipalities          | 1,776,660 | 1,028,573 | 0.72 (0.72-0.73) | 0.74 (0.73-0.74) | 7,212,321  | 1,009,919 | 0.95 (0.95-0.95) | 0.94 (0.94-0.94) | 4,378,317  | 425,138   | 1.00 (1.00-1.00) | 0.98 (0.98-0.98) |
| Rural Municipalities               | 1,600,550 | 916,790   | 0.73 (0.73-0.73) | 0.76 (0.76-0.76) | 5,804,220  | 878,031   | 0.88 (0.88-0.88) | 0.88 (0.88-0.89) | 3,768,726  | 369,091   | 0.99 (0.99-0.99) | 1.00 (1.00-1.00) |

200 \*Adjusted for age group, sex, vaccination status, SARS-CoV-2 infection status, heritage, and type of area

201 In Period II (December 17, 2020 to September 30, 2021), again senior individuals were less likely to be  
202 PCR-tested compared to the reference group of individuals aged 10-19 years, while individuals in the age  
203 groups from 20-69 had higher IRR's. The highest IRR was observed among individuals aged 40-49 years (IRR:  
204 2.51). After their second COVID-19 vaccine dose, individuals had 0.44 times the rate of being tested compared  
205 to individuals with no or one COVID-19 vaccine dose. After SARS-CoV-2 infection, individuals had 0.92 times  
206 the test rate compared to those without a previous SARS-CoV-2 infection. In addition, residents of commuter,  
207 provincial and rural municipalities had reduced IRR's, ranging between 0.88 and 0.94 compared to capital  
208 municipalities (Table 3).

209 In Period III (November 11, 2021 to March 10, 2022), all age groups had lower adjusted IRR's for being  
210 PCR-tested compared to individuals aged 10-19 years, except for individuals aged 30-39 years and 40-49  
211 years. (IRR: 1.06 and IRR: 1.12, respectively). Similar to Period II, it was the three older age groups, which  
212 were less likely to be PCR-tested. However, in Period III, individuals vaccinated with two or three COVID-19  
213 vaccine doses were more likely to be PCR-tested compared to individuals who received none or one COVID-  
214 19 vaccine dose. For individuals vaccinated with two or three doses the IRR was 1.16 and 1.28, respectively.  
215 Individuals with a previous SARS-CoV-2 infection were less likely to be PCR-tested (Table 3).

216 The results of the sub-analysis including only PCR-tests from the community track, showed the same  
217 associations as the main analysis. However, the older age groups were PCR-tested even less in the community  
218 track compared to when the community and the healthcare track was analysed as a group (S2 Table).

## 219 Discussion

220 This study contributes important insight into how the Danish national SARS-CoV-2 test system  
221 functioned and how it was received by the population. A total of 63.7 million PCR-tests and 60.0 million rapid  
222 antigen-tests were performed between February 27, 2020 and March 10, 2022. We show that a high  
223 proportion (91.1%) of the Danish population was PCR-tested at least one time during this period. Although  
224 the test system was used by all demographic groups, female sex, younger age, Danish heritage and living in  
225 the capital area were all factors positively associated with PCR-testing. The association between COVID-19  
226 vaccination and PCR-testing changed from negative to positive over time. Furthermore, the association  
227 between previous infection and PCR-testing changed from positive in Period I to negative in Periods II and III.  
228 The lower test frequency among the oldest age groups may possibly be explained by the older population  
229 either isolating or finding it difficult to use the digital test booking system or having difficulties transporting  
230 themselves to a test station. The high test-frequency among children is likely associated with this group being  
231 more often unvaccinated. Vaccination was not offered before the age of 6 years and overall vaccination  
232 coverage among individuals younger than 16 years was 37%, less than for adults (86%), by end of study. The  
233 fact that persons with recent immigration background had lower test rates is interesting; it might in part be  
234 due to language barriers or perhaps with a tendency to be disenfranchised and less likely to follow  
235 government guidelines.

236 In the study period between December 17, 2020 and September 30, 2021, people vaccinated with two  
237 COVID-19 vaccine doses were less likely to be PCR-tested compared to those given none or just a single  
238 COVID-19 vaccine dose (IRR: 0.44). However, in the study period between November 11, 2021 and March 10,  
239 2022, those vaccinated with two or three COVID-19 vaccine doses were more often PCR-tested despite public  
240 health authorities having encouraged more frequent testing for the unvaccinated. Compared to those given  
241 none or just a single COVID-19 vaccine dose, the IRR was 1.16 and 1.28 for two and three vaccine doses,  
242 respectively. The Omicron SARS-CoV-2 variant was circulating in this period and it was known that vaccine  
243 effectiveness was lower against this variant (10). This might explain why individuals were tested regardless



244 of their vaccination status. Furthermore, the unvaccinated group changes over time and between the two  
245 periods. Unvaccinated people may have been engaging less with the health care system overall, especially in  
246 Period III where all individuals were offered vaccination.

247 Denmark performed more tests per inhabitants than other comparable countries. To illustrate, between  
248 February 27, 2020 and March 10, 2022, the mean number of PCR-tests per day per thousand persons was  
249 14.4 in Denmark, 3.0 in Sweden, 2.8 in Norway, 9.6 in the UK and 2.4 in the Netherlands (3). The Danish  
250 national SARS-CoV-2 test system represented a huge infrastructure investment, but also proved very valuable  
251 for surveillance and control of the epidemic. Testing as many individuals as possible, tracking infected  
252 individuals, and tracing their contacts was deemed in Denmark as an effective strategy to reduce the spread  
253 of the virus. Timely and detailed surveillance data provided a foundation for risk assessments that informed  
254 public health regulations and thus decisions on restrictions such as mask mandates and launch or release of  
255 lockdowns could be made on a foundation of scientific facts. Daily geographic detailed summary results from  
256 the tests was made publicly available via web-based dashboards that were shared with stakeholders and  
257 widely reported in the press. This rapid and open publication of surveillance data was likely also an important  
258 factor in maintaining the population's confidence in the public health authorities.

259 The World Health Organization (WHO) stated that testing was a critical element to the overall  
260 prevention and control strategy for COVID-19 (11). The WHO recommends that all individuals meeting the  
261 case definition for COVID-19, irrespective of vaccination or disease history, be tested for SARS-CoV-2 (11).  
262 However, testing of asymptomatic individuals can be informative in instances such as follow up of contacts  
263 of confirmed or probable cases or testing of health care and long-term care facility workers that are  
264 frequently exposed (11). Notwithstanding, widespread testing of asymptomatic populations, including self-  
265 testing, is not recommended by the WHO, based on lack of evidence on impact and cost-effectiveness of  
266 such approaches and the concern that this approach risks diverting resources from higher priority testing  
267 indications (11). Thus, the Danish test system thus goes beyond what WHO recommended. The available

268 evidence of the effect of mass testing is sparse. A Swiss single-centre cohort study compared two testing  
269 strategies (restricted and extended strategy) (12). They concluded that widespread testing is crucial to  
270 understand and control the spread of infection, and to maximize identification of infected people. Access to  
271 free testing was found to be essential, not only to achieve infection control, but also to eliminate any  
272 discrimination between the different layers of society (12).

273 The Danish test system relied on several features/strengths that enabled the large-scale testing for  
274 SARS-CoV-2. The system leveraged on an existing infrastructure, including information and communication  
275 technologies, which facilitated the centralized and uniform lab set-up and the ability for users to safely log in  
276 and book test time slots and see the test results via computer/smartphone as well as the ability to individually  
277 link data on all residents in Denmark across the nationwide high-quality registries. The low turnaround times  
278 were also a strength as the rapid response made it possible for users to make informed decisions based on  
279 their test results, including mitigation of further spread of SARS-CoV-2. Another strength was that it was  
280 mandatory for providers performing SARS-CoV-2 testing to report electronically to MiBa (5). A limitation was  
281 that rapid antigen self-tests for SARS-CoV-2 infection were not included in the national surveillance.  
282 However, self-tests were introduced into Denmark late and played a smaller role than in many other  
283 countries due to the wide availability of PCR-tests and those testing positive by self-tests were advised to  
284 take a follow-up test in the national PCR-test system. Although we adjusted the Poisson regression models  
285 for potential confounders (sex, age, vaccination status, infection status, heritage and type of area), we cannot  
286 rule out that unmeasured confounders such as time varying COVID-19 guidelines, distance to test station,  
287 socioeconomic factors, and health behaviour may have affected the results. Further research should include  
288 qualitative research to examine barriers for PCR-testing. Furthermore, an assessment of the impact and the  
289 cost effectiveness of the system is beyond the scope of the present paper.

290 The ability to effectively track and trace variants of concern was considered valuable. For example, it  
291 was considered critical for an early and stepwise reopening of the Danish society in April 2020 and it also

292 made it possible to delay community spread of the Delta variant by 10 weeks. This was of major importance  
293 as it provided sufficient time to vaccinate vulnerable groups thus mitigating the impact of the Delta variant.

294 Another benefit of the Danish testing infrastructure was its use for scientific studies. Because the test  
295 information was person-identifiable and linkage with national health and administrative registers were  
296 possible, the test-system also became a resource for epidemiological studies. The different use of the test  
297 system by vaccine status has implications for field studies of vaccine effectiveness. For example, a higher  
298 testing activity among vaccine recipients may lead to underestimating vaccine effectiveness since case  
299 ascertainment will increase in this group. Likewise, in the estimation of immunity following natural infections,  
300 different test behavior after a positive PCR will influence the outcome. The Danish test stations were also  
301 utilised to also conduct national sero-epidemiological study series (13). Moreover, the person-identifiable,  
302 centrally registered test data in combination with Danish health and administrative registers offering data-  
303 linkage, proved an important epidemiological data resource and was used for a large series of studies  
304 providing information, often of international value, during the epidemic. Subsequently, studies on population  
305 protection (14, 15), vaccine effectiveness (10, 16, 17), virulence of variants (18, 19), epidemical dynamics  
306 (20), long COVID (21) and forecasting and risks associated with vulnerable patient or community groups (22-  
307 26) were produced using the data from the study period. With the current paper, we hope to provide a  
308 further basis for such studies to come.

309 It should be recognised that testing patterns depend on factors besides the actual service provided.  
310 Throughout the pandemic various restrictions were implemented and lifted depending on the development  
311 of the pandemic and the developing understanding of the transmission of SARS-CoV-2 (27). During certain  
312 periods a negative PCR-test was necessary in order take part in civil life (e.g. access to sport/public  
313 institutions, restaurants, foreign travel). Further, staff at hospitals, nursing homes and home care have  
314 actively been encouraged to be voluntarily tested at their workplace several times a week for prolonged

315 periods. These recommendations and requirements definitely played a role in testing patterns but is beyond  
316 the scope of this study.

317 In conclusion, the results demonstrate that the extensive, free-of-charge, national SARS-CoV-2 test  
318 system in Denmark was well received by the majority of Danish population. However, demographic  
319 differences in the test uptake existed suggesting challenges to health equity in the society and possible biases  
320 in studies related to SARS-CoV-2. In the future, it might be relevant to focus on increasing the test uptake in  
321 individuals aged 70 years or above and unvaccinated individuals.

## Acknowledgements

We would like to thank the staff in all the test centers, at the ten Departments of Clinical Microbiology in Denmark, and at the many departments of the SSI taking part in setting up and running the test system (including the Virology Laboratory, TestCenter Denmark, Campus Services, the National Biobank, Infections Disease Epidemiology and Prevention, and the Data Integration and Analysis Secretariat). The authors thank Dr. Martin Collin Fjordholt for critical reading of the manuscript. Many structures in Danish society contributed to establishing and running the test centres, special contributions were given by the Novo Nordic Foundation (Grant number: NNF20SA0063854), Novo Nordisk Denmark (providing staff), McKinsey (sourcing) and the Danish Military (logistical support).

## Ethics approval

This article only contains aggregated results and no personal data. According to Danish law, ethical approval should not be obtained for anonymized aggregated register-based studies not using biological material (cf. implementing decree, act no. 1338 of 2020-09-01 on research ethics review of health research projects). For the same reasons, the article is not covered by the European General Data Protection Regulation.

## References

1. Giri B, Pandey S, Shrestha R, Pokharel K, Ligler FS, Neupane BB. Review of analytical performance of COVID-19 detection methods. *Anal Bioanal Chem.* 2021;413(1):35-48.
2. Cheng MP, Papenburg J, Desjardins M, Kanjilal S, Quach C, Libman M, et al. Diagnostic Testing for Severe Acute Respiratory Syndrome-Related Coronavirus 2: A Narrative Review. *Ann Intern Med.* 2020;172(11):726-34.
3. Hannah Ritchie EM, Lucas Rodés-Guirao, Cameron Appel, Charlie Giattino, Esteban Ortiz-Ospina, Joe Hasell, Bobbie Macdonald, Saloni Dattani and Max Roser. Coronavirus (COVID-19) Testing: Our World in Data; [Available from: <https://ourworldindata.org/coronavirus-testing>].
4. COVID-19: Test strategy: The Danish Health Authority and the Ministry of Justice; 2021 [cited 2022 April 4]. Available from: [https://sum.dk/Media/E/2/COVID-19\\_Teststrategi\\_250321.pdf](https://sum.dk/Media/E/2/COVID-19_Teststrategi_250321.pdf).
5. Schønning K, Dessau RB, Jensen TG, Thorsen NM, Wiuff C, Nielsen L, et al. Electronic reporting of diagnostic laboratory test results from all healthcare sectors is a cornerstone of national preparedness and control of COVID-19 in Denmark. *Apmis.* 2021;129(7):438-51.
6. Schmidt M, Pedersen L, Sørensen HT. The Danish Civil Registration System as a tool in epidemiology. *Eur J Epidemiol.* 2014;29(8):541-9.
7. Grove Krause T, Jakobsen S, Haarh M, Mølbak K. The Danish vaccination register. *Euro Surveill.* 2012;17(17).
8. On being tested: Danish Health Authority; [cited 2022 October 12]. Available from: [https://www.sst.dk/en/English/Corona-eng/Symptoms\\_tested-positive-or-a-close-contact/On-being-tested](https://www.sst.dk/en/English/Corona-eng/Symptoms_tested-positive-or-a-close-contact/On-being-tested).
9. : Danish Covid-19 Genome Consortium; [Available from: <https://www.covid19genomics.dk/>].
10. Gram MA, Emborg HD, Schelde AB, Friis NU, Nielsen KF, Moustsen-Helms IR, et al. Vaccine effectiveness against SARS-CoV-2 infection or COVID-19 hospitalization with the Alpha, Delta, or Omicron SARS-CoV-2 variant: A nationwide Danish cohort study. *PLoS Med.* 2022;19(9):e1003992.

11. Recommendations for national SARS-CoV-2 testing strategies and diagnostic capacities: World Health Organization; 2021 [cited 2022 October 12]. Available from:  
<https://www.who.int/publications/i/item/WHO-2019-nCoV-lab-testing-2021.1-eng>.
12. Baggio S, Spechbach H, Vernaz N, Guessous I, Gétaz L, Kaiser L, et al. SARS-CoV-2 testing strategy: A comparison of restricted and extended strategies in a Swiss outpatient cohort from the community and hospital employees. *PLoS One*. 2021;16(4):e0250021.
13. Espenhain L, Tribler S, Sværke Jørgensen C, Holm Hansen C, Wolff Sönksen U, Ethelberg S. Prevalence of SARS-CoV-2 antibodies in Denmark: nationwide, population-based seroepidemiological study. *Eur J Epidemiol*. 2021;36(7):715-25.
14. Hansen CH, Michlmayr D, Gubbels SM, Mølbak K, Ethelberg S. Assessment of protection against reinfection with SARS-CoV-2 among 4 million PCR-tested individuals in Denmark in 2020: a population-level observational study. *The Lancet*. 2021;397(10280):1204-12.
15. Michlmayr D, Hansen CH, Gubbels SM, Valentiner-Branth P, Bager P, Obel N, et al. Observed protection against SARS-CoV-2 reinfection following a primary infection: A Danish cohort study among unvaccinated using two years of nationwide PCR-test data. *Lancet Reg Health Eur*. 2022;20:100452.
16. Gram MA, Nielsen J, Schelde AB, Nielsen KF, Moustsen-Helms IR, Sørensen AKB, et al. Vaccine effectiveness against SARS-CoV-2 infection, hospitalization, and death when combining a first dose ChAdOx1 vaccine with a subsequent mRNA vaccine in Denmark: A nationwide population-based cohort study. *PLoS Med*. 2021;18(12):e1003874.
17. Nielsen KF, Moustsen-Helms IR, Schelde AB, Gram MA, Emborg HD, Nielsen J, et al. Vaccine effectiveness against SARS-CoV-2 reinfection during periods of Alpha, Delta, or Omicron dominance: A Danish nationwide study. *PLoS Med*. 2022;19(11):e1004037.
18. Lyngse FP, Kirkeby CT, Denwood M, Christiansen LE, Mølbak K, Møller CH, et al. Household transmission of SARS-CoV-2 Omicron variant of concern subvariants BA.1 and BA.2 in Denmark. *Nat Commun*. 2022;13(1):5760.

19. Lyngse FP, Mortensen LH, Denwood MJ, Christiansen LE, Møller CH, Skov RL, et al. Household transmission of the SARS-CoV-2 Omicron variant in Denmark. *Nat Commun.* 2022;13(1):5573.
20. Espenhain L, Funk T, Overvad M, Edslev SM, Fonager J, Ingham AC, et al. Epidemiological characterisation of the first 785 SARS-CoV-2 Omicron variant cases in Denmark, December 2021. *Euro Surveill.* 2021;26(50).
21. Sørensen AIV, Spiliopoulos L, Bager P, Nielsen NM, Hansen JV, Koch A, et al. A nationwide questionnaire study of post-acute symptoms and health problems after SARS-CoV-2 infection in Denmark. *Nat Commun.* 2022;13(1):4213.
22. Hansen CH, Friis NU, Bager P, Stegger M, Fonager J, Fomsgaard A, et al. Risk of reinfection, vaccine protection, and severity of infection with the BA.5 omicron subvariant: a nation-wide population-based study in Denmark. *Lancet Infect Dis.* 2022.
23. Bager P, Wohlfahrt J, Fonager J, Rasmussen M, Albertsen M, Michaelsen TY, et al. Risk of hospitalisation associated with infection with SARS-CoV-2 lineage B.1.1.7 in Denmark: an observational cohort study. *Lancet Infect Dis.* 2021;21(11):1507-17.
24. Nilsson SF, Laursen TM, Osler M, Hjorthøj C, Benros ME, Ethelberg S, et al. Adverse SARS-CoV-2-associated outcomes among people experiencing social marginalisation and psychiatric vulnerability: A population-based cohort study among 4,4 million people. *Lancet Reg Health Eur.* 2022;20:100421.
25. Nilsson SF, Laursen TM, Osler M, Hjorthøj C, Benros ME, Ethelberg S, et al. Vaccination against SARS-CoV-2 infection among vulnerable and marginalised population groups in Denmark: A nationwide population-based study. *Lancet Reg Health Eur.* 2022;16:100355.
26. Overvad M, Koch A, Jespersen B, Gustafsson F, Krause TG, Hansen CH, et al. Outcomes following SARS-CoV-2 infection in individuals with and without solid organ transplantation-A Danish nationwide cohort study. *Am J Transplant.* 2022;22(11):2627-36.



27. Munch PK, Espenhain L, Hansen CH, Krause TG, Ethelberg S. Case-control study of activities associated with SARS-CoV-2 infection in an adult unvaccinated population and overview of societal COVID-19 epidemic counter measures in Denmark. PLoS One. 2022;17(11):e0268849.

## Supporting information captions

S1 Methods

S1 Table. Definition of heritage (as defined by Statistics Denmark)

S2 Table. Unadjusted and adjusted IRR for PCR testing in the community track by sex, age, vaccination status, infection status, heritage and type of area in three study periods

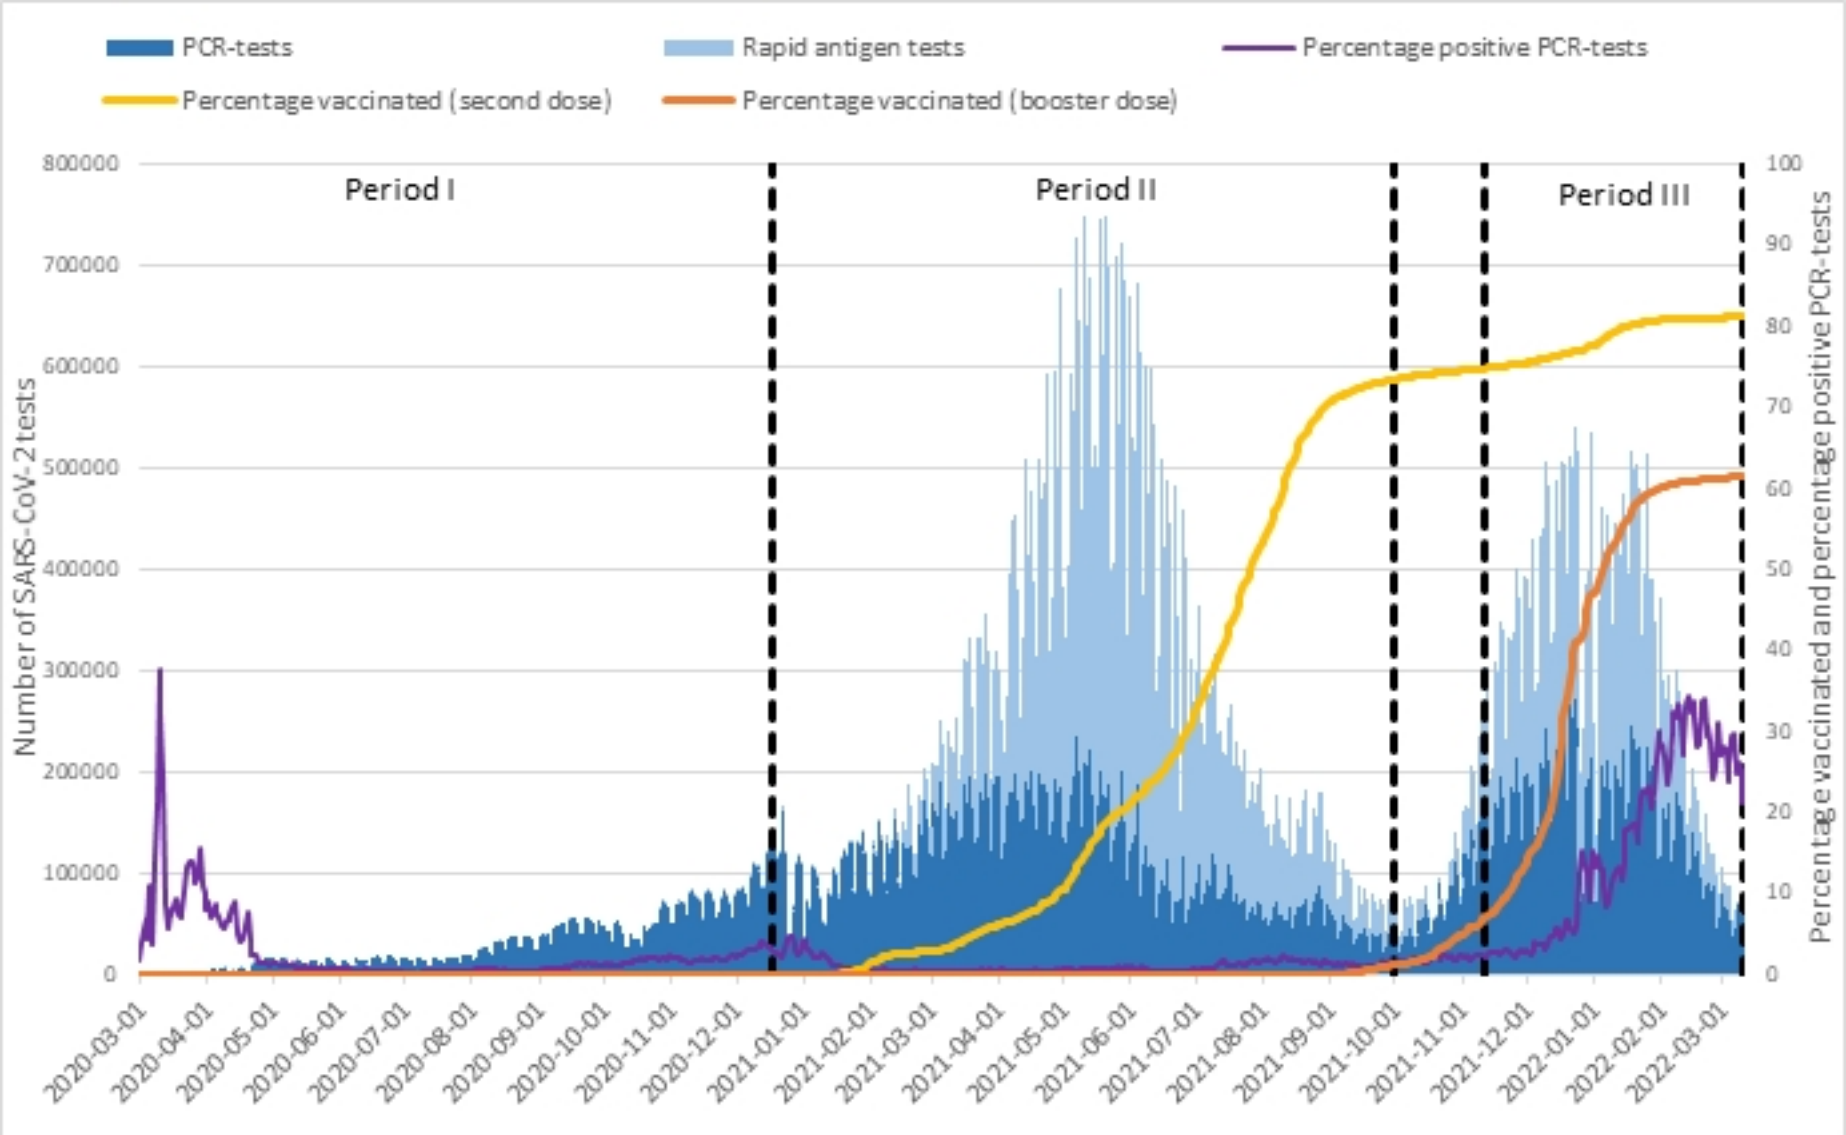

Figure 1

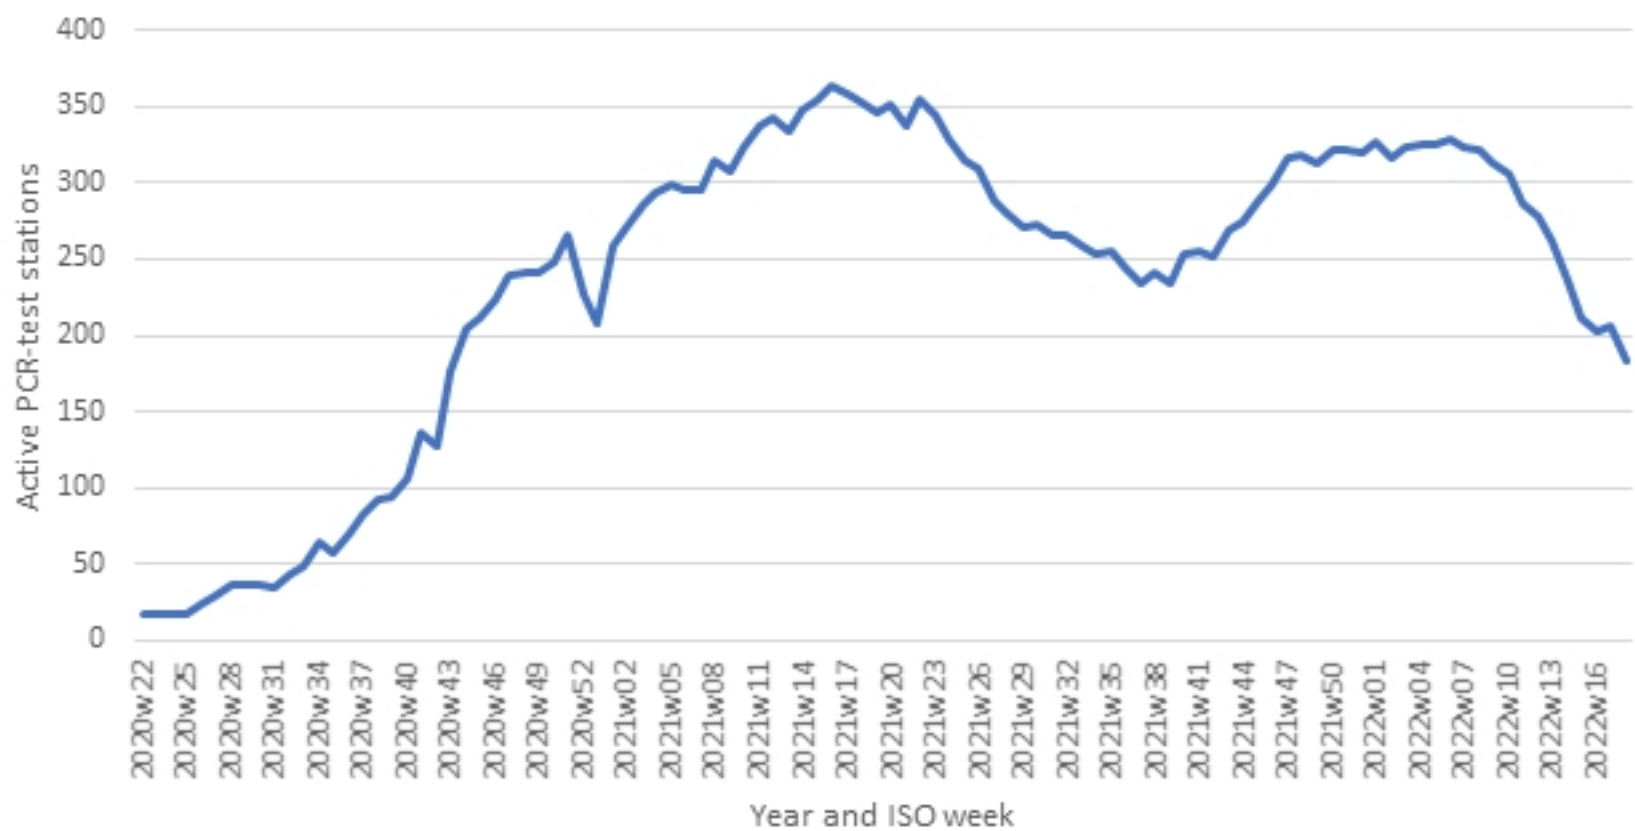

Figure2
